# Supplementary material for: The heterotopic heart transplantation in mice as a small animal model to study mechanical unloading – Establishment of the procedure, perioperative management and postoperative scoring
Source: PLoS One. 2019 Apr 12;14(4):e0214513. doi: 10.1371/journal.pone.0214513 (PMC6461225; doi:10.1371/journal.pone.0214513)
Supplement: S5 Table — For each consecutive operation the gender is listed. (XLSX) [file pone.0214513.s005.xlsx]

## Sheet: S5 Fig. 13 
Gender distribution
No of operation	Gender
1	f
2	f
3	f
4	f
5	m
6	m
7	f
8	m
9	m
10	f
11	f
12	m
13	m
14	m
15	m
16	m
17	m
18	m
19	m
20	f
21	f
22	m
23	m
24	f
25	m
26	f
27	f
28	f
29	m
30	f
31	f
32	m
33	m
34	f
35	f
36	f
37	m
38	f
39	f
40	m
41	m
42	f
43	m
44	m
45	f
46	m
47	m
48	m
49	f
50	m
51	m
52	f
53	m
54	f
55	f
56	f
57	m
58	f
59	f
60	f
61	f
62	m
63	m
64	m
65	f
66	m
67	f
68	f
69	m
70	m
71	f
72	f
73	m
74	m
75	m
76	m
77	f
78	f
79	f
80	m
81	m
82	f
83	m
84	m
85	m
86	m
87	f
88	f
89	f
90	f
91	m
92	f
93	m
94	m
95	f
96	m
97	m
98	f
99	f
100	m
101	f
102	f
103	f
104	m
105	m
106	m
107	f
108	f
109	m
110	m
111	f
112	m
113	f
114	m
115	f
116	f
117	m
118	m
119	m
120	f
121	m
122	m
123	f
124	m
125	m
126	m
127	m
128	m
129	f
130	m
131	m
132	m
133	m
134	m
135	f
136	m
137	f
138	f
139	m
140	f
141	f
142	f
143	m
144	m
145	f
146	f
147	m
148	f
149	m
150	m
151	m
152	f
153	m
154	m
155	m
156	f
157	m
158	m
159	m
160	m
161	f
162	f
163	m
164	f
165	m
166	f
167	f
168	f
169	f
170	m
171	m
172	m
173	m
174	m
175	m
176	f
177	f
178	m
179	f
180	f
181	m
182	m
183	m
184	m
185	f
186	f
187	f
188	m
189	m
190	f
191	m
192	f
193	m
194	m
195	m
196	m
197	m
198	f
199	m
200	m
201	f
202	f
203	m
204	m
205	m
206	f
207	m
208	m
209	m
210	m
211	m
212	m
213	f
214	f
215	f
216	m
217	m
218	m
219	f
220	m
221	f
222	f
223	m
224	m
225	f
226	f
227	m
228	f
229	m
230	f
231	f
232	m
233	f
234	f
235	m
236	m
237	f
238	f
239	f
240	m
241	f
242	f
243	f
244	f
245	m
246	m
247	m
248	f
249	m
250	f
251	f
252	m
253	m
254	f
255	m
256	m
257	f
258	m
259	f
260	m
261	m
262	m
263	f
264	m
265	f
266	f
267	m
268	m
269	m
270	m
271	f
272	f
273	m
274	m
275	m
276	f
277	m
278	m
279	m
280	m
281	m
282	m
283	f
284	m
285	m
286	m
